# 1 **Modulating Sphingosine-1-Phosphate receptors to improve chemotherapy delivery to** 2 **Ewing sarcoma**

3  
4 Enrica Marmonti<sup>1</sup>, Hannah Savage<sup>1</sup>, Aiqian Zhang<sup>1,2</sup>, Claudia Alvarez<sup>1</sup>, Miriam Morrell<sup>3</sup> and Keri  
5 Schadler<sup>1</sup>

6  
7 <sup>1</sup>Department of Pediatric Research, MD Anderson Cancer Center, Houston, Texas; <sup>2</sup>Department of  
8 Gynecology, Third Xiangya Hospital of Central South University, Changsha, Hunan, China;  
9 <sup>3</sup>Department of Pediatrics, MD Anderson Cancer Center, Houston, Texas.

10  
11 **Corresponding author:** Keri Schadler, PhD, Department of Pediatric Research, Unit 853, The  
12 University of Texas MD Anderson Cancer Center, 1515 Holcombe Boulevard, Houston, TX 77030.  
13 Phone: 713-794-1035; Fax: 713-563-5604; E-mail: [klschadl@mdanderson.org](mailto:klschadl@mdanderson.org).

14  
15 **Conflict of interest:** The authors have no conflicts of interest to declare.

## 16 **Abbreviations:**

17 S1P= Sphingosine-1-Phosphate

18 S1PR= Sphingosine-1-Phosphate receptor

19 ES= Ewing Sarcoma

20 VEGF-A= Vascular Endothelial Growth Factor-A

21 Akt= Protein kinase B

22 ERK= Extracellular signal-regulated kinase

23 Rac1= RAS-related C3 botulinum toxin substrate 1

24 VE-cadherin= Vascular Endothelial-cadherin

25 ROCK1= Rho associated protein kinase1

26 PTEN= Phosphatase and tensin homologue

27  $\alpha$ -SMA= alpha-smooth muscle actin

28 NG2= Neural/glial antigen2 Chondroitin Sulfate Proteoglycan

29 CAIX= Carbonic anhydrase IX

30 GLUT-1= Glucose Transport-1

31 HIF1 $\alpha$ = Hypoxia inducible factor 1 subunit alpha

32 GADPH= Glyceraldehyde3-phosphate dehydrogenase

33 PyMT =Polyoma middle T antigen

34 DOXO= Doxorubicin

35 SEW= SEW2871

36 JTE= JTE-013

37 DMSO=dimethyl sulfoxide

38 DAPI=4',6'-diamidino-2-phenylindole, dyhydrochloride

39 NF- $\kappa$ B=Nuclear factor kappa light chain enhancer of activated B cells

40 FITC=Fluorescein isothiocyanate

42 **NOVELTY AND IMPACT**

43 This study demonstrates that Sphingosine-1-Phosphate (S1P) receptors are potential novel targets for  
44 tumor vasculature remodeling and adjuvant therapy for the treatment of Ewing Sarcoma. Unlike  
45 receptor tyrosine kinases that have already been extensively evaluated for use as vascular normalizing  
46 agents in oncology, S1P receptors are G protein-coupled receptors, which have not been well studied  
47 in tumor endothelium. Pharmacologic activators and inhibitors of S1P receptors are currently in clinical  
48 trials for treatment of auto-immune and cardiovascular diseases, indicating potential for clinical  
49 translation of this work.

50

51 **ABSTRACT**

52 Tumor vasculature is innately dysfunctional. Poorly functional tumor vessels inefficiently deliver  
53 chemotherapy to tumor cells; vessel hyper-permeability promotes chemotherapy delivery primarily to a  
54 tumor's periphery. Here we identify a method for enhancing chemotherapy delivery and efficacy in  
55 Ewing sarcoma (ES) in mice by modulating tumor vessel permeability. Vessel permeability is partially  
56 controlled by the G protein-coupled Sphingosine-1-phosphate receptors 1 and 2 (S1PR1 and S1PR2) on  
57 endothelial cells. S1PR1 promotes endothelial cell junction integrity while S1PR2 destabilizes it. We  
58 hypothesize that an imbalance of S1PR1:S1PR2 is partially responsible for the dysfunctional vascular  
59 phenotype characteristic of ES and that by altering the balance in favor of S1PR1, ES vessel hyper-  
60 permeability can be reversed. In this study, we demonstrate that pharmacologic activation of S1PR1 by  
61 SEW2871 or inhibition of S1PR2 by JTE-013 caused more organized, mature, and functional tumor  
62 vessels. Importantly, S1PR1 activation or S1PR2 inhibition improved chemotherapy delivery to the  
63 tumor and anti-tumor efficacy. Our data suggests that pharmacologic targeting of S1PR1 and S1PR2  
64 may be a useful adjuvant to standard chemotherapy for ES patients.

65

66 **Keywords:** Ewing sarcoma, S1PR1, S1PR2, Vascular permeability, Chemotherapy efficacy

67

68

69

## 70 INTRODUCTION

71 Ewing sarcoma (ES) is an aggressive sarcoma of bone and soft tissue that represents 3% of all  
72 pediatric malignancies<sup>1</sup>. ES tumor vessels, like vessels in many solid tumors, are characterized by a  
73 discontinuous endothelial lining with wide endothelial cell junctions and disjointed pericyte coverage.  
74 This contributes to marked vessel leakiness<sup>2</sup>. Excessive vascular leakage causes chemotherapy  
75 extravasation at the periphery of the tumor, contributing to suboptimal chemotherapy efficacy<sup>2</sup>.

76 Vascular remodeling, or normalization, using anti-angiogenic agents enhances perfusion and  
77 drug delivery in solid tumors<sup>3</sup>. A “normalized” vascular phenotype includes improved vessel function  
78 and reduced hyper-permeability; specifically, increased perivascular cell coverage and restored  
79 endothelial barrier integrity<sup>3</sup>. It was recently demonstrated that combination of anti-angiogenic agent  
80 celecoxib with standard chemotherapy improved survival in patients with metastatic ES<sup>4</sup>. Although this  
81 study indicates the potential of vascular remodeling as adjuvant therapy for ES, severe toxicities limited  
82 clinical usefulness of the anti-angiogenic agent.

83 Here, we present an alternative approach to improve drug delivery by targeting tumor vascular  
84 hyper-permeability. Several tumor secreted factors such as vascular endothelial growth factor-A  
85 (VEGF-A) cause disruption of adherens junctions by phosphorylation, internalization and cleavage of  
86 Vascular-Endothelial cadherin (VE-cadherin), an essential regulator of endothelial cell-cell adhesive  
87 properties<sup>5</sup>. Sphingosine-1-Phosphate (S1P) is a sphingolipid that regulates endothelial barrier function  
88 and angiogenesis via G protein-coupled S1P Receptors 1 and 2 (S1PR1 and S1PR2)<sup>6</sup>. S1PR1-G<sub>i</sub>-Rac  
89 signaling decreases vessel permeability and enhances endothelial cell-to-cell junctions by inducing VE-  
90 cadherin trafficking to adhesion sites<sup>6</sup>. S1PR1 also regulates the interaction of perivascular and  
91 endothelial cells in microvasculature, creating more mature vessels<sup>7</sup>. Conversely, S1PR2 activation  
92 disrupts endothelial cell junctions via the G<sub>12/13</sub>- Rho-Rho kinase kinase (ROCK)-PTEN pathway by  
93 preventing VE-cadherin translocation to cell contact sites<sup>8</sup>. The balance of S1PR1 and S1PR2 in a  
94 vascular bed thus defines endothelial barrier integrity<sup>8</sup>. In physiologic conditions, a high S1PR1: low  
95 S1PR2 ratio maintains a stabilized and intact vascular endothelium while a low S1PR1: high S1PR2  
96 ratio causes endothelial barrier dysfunction<sup>9</sup>. Although the antagonistic relationship between S1PR1

97 and S1PR2 is known in healthy endothelium and several disorders related to pathologic vascular  
98 permeability<sup>8</sup>, the role of these receptors in modulating tumor vasculature function is poorly understood.

99 We previously demonstrated that S1PR1 and S1PR2 are expressed on ES endothelium and  
100 that reduced tumor vessel hyper-permeability after exercise-induced shear stress correlates with  
101 increased S1PR1 and decreased S1PR2<sup>10</sup>. These findings suggest that ES vessel function might be  
102 improved by altering the balance in favor of S1PR1. To elucidate the role of S1PR1 and S1PR2 on  
103 tumor vasculature function, we performed preclinical studies in human ES mouse xenograft models  
104 using selective pharmacological modulators of S1PR1 and S1PR2. SEW2871 is a S1PR1-selective  
105 agonist that induces receptor internalization and subsequent recycling via AKT/ERK1/2/Rac1 pathway  
106 activation<sup>6</sup>. JTE-013 is an S1PR2 antagonist which prevent ROCK-PTEN pathway activation<sup>8</sup>.

107 Here, we demonstrate that activation of S1PR1 signaling or inhibition of S1PR2 signaling  
108 induced more normalized tumor vessels with reduced hyper-permeability. Importantly, vascular  
109 normalization by S1P receptor modulation correlated with significantly improved chemotherapy efficacy.  
110 This is the first study to demonstrate the role of S1P receptors in vascular function in ES. Our findings  
111 reveal a novel mechanism of tumor vascular remodeling via activation of S1PR1 and inhibition of  
112 S1PR2 signaling that contributes to increased chemotherapy delivery and, therefore, increased anti-  
113 tumor effects in mice.

114

## 115 **MATERIAL AND METHODS**

### 116 **Cell culture**

117 A673 ES cells (ATCC Cat# CRL-1598, RRID:CVCL\_0080) were cultured per manufacturer  
118 recommendation. Cells are authenticated by STR analysis at MD Anderson Cancer Center  
119 Characterized Cell Line Core Facility within the lasts three years and routinely tested negative for  
120 mycoplasma contamination.

121

122

123

## 124 **Animals and experimental protocol**

125 The Institutional Animal Care and Use Committee at The University of Texas MD Anderson  
126 Cancer Center approved the animal studies. A673 cells ( $2.5 \times 10^6$ ) were injected subcutaneously into the  
127 backs of 6-week-old athymic nude (nu/nu) male mice. After tumors reached  $\sim 50 \text{ mm}^3$ , mice were  
128 randomized into 4 groups: daily oral vehicle (dimethyl sulfoxide [DMSO] or alcohol), daily oral  
129 pharmaceutical agent (SEW2871 10mg/kg or JTE-013 1.5mg/kg; Cayman Chemical), intravenous  
130 doxorubicin (2mg/kg twice per week; Premier Pharmacy), and combination therapy with pharmaceutical  
131 agent + doxorubicin. The SEW2871 experiment was repeated in an orthotopic model using the same  
132 treatment schedule in which A673 cells ( $2.5 \times 10^5$ ) were injected into the gastrocnemius of 6-week-old  
133 nude mice. Mice were housed in individually ventilated cages under pathogen-free conditions. Animals  
134 had free access to food and water and were kept on a 12-hour light/12-hour dark cycle.

135

## 136 **Vessel structure and function**

137 Five minutes prior to euthanasia, tumor-bearing mice were injected via tail vein with 100 $\mu$ L  
138 tomato-lectin (2mg/mL in PBS 7.4, VectorLab) or high molecular weight FITC-Dextran (2,000,000 mol  
139 weight, 10mg/mL in PBS pH 7.4; Sigma-Aldrich).

140 Frozen tumor sections were stained with the following primary antibodies: rat anti-CD31 (1:50,  
141 BD Pharmingen), rabbit anti- alpha-smooth muscle actin ( $\alpha$ -SMA, 1:100, Abcam Ab5694;), rabbit anti-  
142 NG2 Chondroitin Sulfate Proteoglycan (NG2, 1:100, AB5320 Millipore), mouse rat anti-Vascular  
143 Endothelial cadherin (Ve-caderin, 1:100, BD Pharmingen). Nuclei were stained with Fluoro-Gel II with  
144 DAPI (Electron Microscopy Sciences). Images were captured with a Leica DM5500 B upright  
145 microscope imaging system (Leica Microsystems) and analyzed using NIS-Elements Imaging Software.  
146 For all immunostaining assays, 5 random fields from each tumor sample were quantified as previously  
147 described<sup>11</sup>. Images for VE-cadherin and CD31 staining were obtained with a 63x oil immersion  
148 objective using a Zeiss LSM 880 with Airyscan FAST confocal microscope. Pearson's correlation  
149 coefficient was calculated to measure the colocalization correlation of the intensity distribution between  
150 VE-cadherin and CD31 of 5 random vessels per tumor sections.

151 **Hypoxia**

152 qPCR was performed with iQ SYBR<sup>®</sup> Green Supermix (Bio-Rad) and run on a LightCycler<sup>®</sup> 480  
153 Instrument II (Roche). Carbonic anhydrase IX (CAIX) (FW: GAGAAGGCAGCACAGAAG G and REV:  
154 GGCTTCTCACATTCTCCAAGAT) and Glucose Transport-1 primers (GLUT-1) (FW: GGGCCA  
155 AGAGTGTGCTAAA and REV: CTTCTTCTCCCGCATCATCTG), Vascular Endothelial Growth Factor-A  
156 (VEGF-A) (FW: GTGAATGCAGACCAAAGAAAGATA G and REV: CCAGGACTTATACCGGGATTTC);  
157 Hypoxia inducible factor 1 subunit alpha-1 $\alpha$  (HIF-1 $\alpha$ ) (FW: GTCTGCAACATGGAAGGTATTG and  
158 REV: GCAGGTCATAGGTGGTTTCT) as well as internal control primers Glyceraldehyde-3-phosphate  
159 dehydrogenase (GAPDH) (FW: AACAGCAACTCCCCTCTTC and REV:  
160 CCTGTTGCTGTAGCCGTATT) were synthesized by Integrated DNA Technologies.

161

162 **Proliferation assay (Live-cell imaging)**

163 A673 cells ( $5 \times 10^3$  per well) were grown in a 96-well plate and filmed every four hours for 48  
164 hours with Incucyte live cell imaging system (Essen Instrument., Ann Harbor, MI). Doxorubicin  
165 (0.01nM), SEW2871 (50nM), or JTE-013 (50 $\mu$ M) was added at the beginning of the quantification  
166 period, or DMSO or ethanol as a negative control. The experiment was performed three times.  
167 Proliferation was monitored by analyzing the cell occupied area (% confluence) of images over time.

168

169 **Statistical analysis**

170 All values are reported as means  $\pm$  standard error of the mean. Statistical significance of the results  
171 was calculated by two-way analysis of variance. Intergroup differences were evaluated by using  
172 student's t-test and linear mixed models. The statistical analysis was performed using SpSS (version  
173 21) and Graphpad software.

174

175 All data and detailed methods will be made available upon reasonable request.

176

177 **RESULTS**

178 **S1PR1 activation by SEW2871 promotes tumor vascular normalization.**

179 To determine the effect of S1PR1 activation in ES, A673 subcutaneous and orthotopic  
180 xenografts were established in nude mice. Mice were treated with an S1PR1 selective agonist,  
181 SEW2871, alone or in combination with doxorubicin. There were no significant differences in  
182 microvessel density or total vessel count between tumors in different treatment groups in either  
183 subcutaneous or orthotopic tumors (data not shown). In both models, S1PR1 activation promoted tumor  
184 vessel normalization. SEW2871 treatment stimulated the formation of more elongated vessels with a  
185 greater number of open lumens in subcutaneous tumors (Elongated Vessels: SEW  $p=0.016$ , Lumens:  
186 SEW  $p=0.046$ , Fig. 1A and C) and orthotopic tumors (Elongated Vessels: SEW  $p=0.014$ , Lumens: SEW  
187  $p=0.013$ , Fig. 1B and D). Further, S1PR1 activation significantly increased mural cell coverage of tumor  
188 vessels. The percentage of tumor capillaries with observable alpha-smooth-muscle actin ( $\alpha$ -SMA)  
189 (SEW  $p=0.002$ , Fig. 1E) and Neuron-glia 2 (NG2) labeling (SEW  $p=0.046$ , Fig. 1F) was significantly  
190 increased in SEW-treated subcutaneous tumor sections compared to untreated tumors. Similarly, but  
191 with a less significant effect,  $\alpha$ -SMA (SEW  $p=0.061$ , Fig. 1E) and NG2 (Fig. 1F, SEW  $p=0.065$ )  
192 coverage of capillaries was also increased in SEW-treated orthotopic tumors.

193 Tumor vascular permeability was assessed by injection of high molecular weight FITC-dextran  
194 (2000 KDa), a molecule that does not leak from functional vessels<sup>12</sup>. S1PR1 activation caused a 34%  
195 reduction in vascular leakiness of subcutaneous tumor vessels that became more evident in  
196 doxorubicin-treated mice (87%; DOXOxSEW  $p=0.005$ , Fig. 1G). In the orthotopic model, a significant  
197 reduction in dextran leakage was observed in both tumors treated with SEW2871 alone (53%) or in  
198 combination with doxorubicin (52%; SEW  $p=0.004$ , Fig. 1G).

199 To confirm improvement in barrier integrity by the S1PR1 activation, we analyzed VE-cadherin  
200 protein expression and localization at the plasma membrane by confocal microscopy analysis. Although  
201 SEW2871 treatment did not change the total VE-cadherin expression levels (data not shown), it did  
202 significantly increase the translocation of VE-cadherin at the adhesion sites, demonstrated by co-  
203 localization with CD31 in both subcutaneous and orthotopic tumors (Fig. 1H-I).

204 **S1PR2 inhibition by JTE-013 promotes tumor vasculature normalization.**

205 To study the impact of S1PR2 inhibition on tumor angiogenesis, mice bearing subcutaneous  
206 A673 tumors were treated with JTE-013, doxorubicin, or the combination of JTE-013 and doxorubicin.  
207 Inhibition of S1PR2 caused a significantly higher microvessel density ( $p=0.027$ ) that appeared more  
208 elongated ( $p=0.068$ ) with a greater number of open lumens ( $p=0.067$ ) in subcutaneous tumors (Fig. 2A,  
209 C). There was no significant effect of JTE-013 in remodeling microvessel structure and organization in  
210 orthotopic tumors (data not shown). Although  $\alpha$ -SMA (Fig. 2A, D) and NG2 cell coverage did not  
211 change (Fig. 2A, E), JTE-013 reduced tumor vessel leakage by 68% and 43.7% in subcutaneous and  
212 orthotopic tumors, respectively ( $p=0.038$ , Fig. 2F and 2G). Additionally, while the pharmacological  
213 inhibition of the S1PR2 pathway did not affect VE-cadherin translocation at the plasma membrane (data  
214 not shown), we observed a trend toward S1PR2 antagonism increasing VE-cadherin protein expression  
215 levels in both subcutaneous (SEW  $p=0.064$ , Fig. 2H-I) and orthotopic tumors (SEW  $p=0.071$ , Fig. 2H-I).

216

217 **S1PR1 activation or S1PR2 inhibition improved chemotherapy efficacy.**

218 The vascular remodeling observed after SEW2871 treatment correlated with a 2-fold increase  
219 (51%) in the number of functional (lectin perfused) vessels compared to control tumors ( $p=0.028$ , Fig.  
220 3A). Consistent with improved vascular function leading to reduced tumor hypoxia, SEW2871  
221 significantly reduced CaIX (46%; SEW  $p=0.043$ , Fig. 3B) and VEGF-A mRNA levels (71%; SEW  
222  $p=0.045$ ) and had a clear trend toward reduced GLUT-1 (63%, Fig. 3B) and HIF1- $\alpha$  mRNA in orthotopic  
223 tumors (33%, Fig. 3B). Improved tumor perfusion and reduced hypoxia should improve chemotherapy  
224 delivery. Indeed, SEW2871 plus chemotherapy inhibited A673 tumor growth better than chemotherapy  
225 alone (subcutaneous: 41% better, Time: DOX+SEW vs DOX  $p<0.0001$ ; and orthotopic: 45% better,  
226 Time: DOX+SEW vs DOX  $p<0.0001$ , Fig. 3C). No additive effect of SEW2871 and doxorubicin in  
227 inhibiting proliferation of A673 cells was observed *in vitro* (Fig. 3D).

228 Unlike S1PR1 activation, S1PR2 pathway inhibition did not significantly change CaIX, GLUT-1,  
229 HIF1- $\alpha$ , VEGF-A mRNA levels in orthotopic tumors (Fig. 3E). Still, tumors treated with the combination



230 of JTE-013 and doxorubicin were significantly smaller than tumors treated with doxorubicin alone in  
231 both xenograft models (subcutaneous: 43.9%, DOX+JTE vs JTE  $p=0.02$ ; orthotopic 49.8% better,  
232  $p=0.03$ ) (Fig. 3F). JTE-013 treatment did not enhance the cytotoxicity of doxorubicin in A673 cells *in*  
233 *vitro* (Fig. 3G).

234

## 235 **DISCUSSION**

236 Here, we provide evidence that modulating the ratio of S1PR1:S1PR2, by inhibiting S1PR1 or  
237 activating S1PR2, may be a novel method to remodel tumor vasculature and increase the delivery and  
238 thus the efficacy of chemotherapy.

239 In ES tumors, the activation of S1PR1 preferentially manifested as more elongated and open  
240 lumen vessels markedly covered with mural cells. Instead of promoting vascular sprouting and  
241 neoformation as previously reported in PyMT breast cancer<sup>13</sup>, the activation of S1PR1 by the agonist  
242 SEW2871 principally remodeled the morphology of ES tumor vessels to a more mature phenotype.  
243 This different vascular response may be partially dependent on tumor type. In comparison to other  
244 tumor types, ES vascular network is unique as it is characterized by a more morphologically organized  
245 vascular network<sup>10</sup>. However, consistent with other tumors, vasculature is dysfunctional and hyper-  
246 permeable.

247 The inhibition of S1PR2 by the antagonist JTE-013 only marginally increased the microvessel  
248 density, consistent with a previous report in S1PR2<sup>-/-</sup> mice bearing Lewis Lung carcinoma and  
249 B16BL6<sup>14</sup>. Since more significant effects on vascular remodeling was observed by activating S1PR1,  
250 the inhibition of S1PR2 by pharmacological modulation might be not sufficient enough to overcome the  
251 vascular dysfunction largely caused by lack of S1PR1 pathway activations in ES tumors.

252 In addition, we demonstrated that improved endothelial cells junction function might be involved  
253 in tumor vascular normalization. Activation of S1PR1 reduced leakage of tumor vessels by stimulating  
254 the recruitment of mural cells around the endothelium and increasing VE-cadherin localization at  
255 endothelial junctions. Inhibition of S1PR2 also decreased vascular hyper-permeability, but the  
256 mechanism by which this occurs is less clear, as changes to VE-cadherin localization were subtle. The

257 trend toward increased VE-cadherin expression after inhibition of S1PR2 is consistent with previous  
258 reports that S1PR2 signaling via NF- $\kappa$ B<sup>15</sup> promotes the expression of the zinc-finger transcription factor  
259 Snail that represses VE-cadherin transcription in endothelial cells exposed to cancer cell-conditioned  
260 media<sup>16,17</sup>.

261 In addition, we demonstrated that the S1PR1 agonism by SEW2871 contributes to increased  
262 blood vessel perfusion and oxygenation of the tumor. Lower levels of hypoxia responsive transcripts,  
263 including VEGF $\alpha$ , confirm a reduction in hypoxia<sup>18</sup>. Considering that lower levels of VEGF $\alpha$  result in  
264 more stable endothelial cell adhesion junctions<sup>5,19</sup>, S1PR1 activation may alternatively increase vessel  
265 function as a result of decreased tumor hypoxia.

266 Moreover, since hypoxia induces cellular adaptations that promote cell survival and resistance  
267 to chemotherapy<sup>20</sup>, the reduced hypoxic environment likely contributes to a greater anti-tumor  
268 response. By using athymic nude mice, which lack functional T-cells, we removed any possible effects  
269 of S1P receptor signaling modulation on lymphocytes trafficking and immune regulation<sup>21</sup>. Therefore,  
270 the increased chemotherapy efficacy observed by the combined therapy was likely endothelial cell  
271 dependent.

272 Our findings demonstrate that S1PR1 and S1PR2 in ES vasculature can be modulated to  
273 normalize tumor vessels and improve chemotherapy efficacy. As such, the pharmacologic targeting of  
274 S1PR1 and S1PR2 warrants further study as potential adjuvant therapy targets for Ewing sarcoma  
275 patients.

276

## 277 REFERENCES

- 278 1. Jain S, Kapoor G. Chemotherapy in Ewing's sarcoma. *Indian J Orthop [Internet]* 2010 [cited  
279 2018 Jan 19];44:369–77. Available from: <http://www.ncbi.nlm.nih.gov/pubmed/20924476>
- 280 2. Azzi S, Hebda JK, Gavard J. Vascular permeability and drug delivery in cancers. *Front Oncol*  
281 *[Internet]* 2013 [cited 2019 Jan 10];3:211. Available from:  
282 <http://www.ncbi.nlm.nih.gov/pubmed/23967403>
- 283 3. Jain RK. Normalizing tumor vasculature with anti-angiogenic therapy: a new paradigm for  
284 combination therapy. *Nat Med [Internet]* 2001 [cited 2018 Jan 28];7:987–9. Available from:  
285 <http://www.ncbi.nlm.nih.gov/pubmed/11533692>
- 286 4. Felgenhauer JL, Nieder ML, Krailo MD, Bernstein ML, Henry DW, Malkin D, Baruchel S, Chuba  
287 PJ, Sailer SL, Brown K, Ranganathan S, Marina N. A pilot study of low-dose anti-angiogenic  
288 chemotherapy in combination with standard multiagent chemotherapy for patients with newly

- 289 diagnosed metastatic Ewing sarcoma family of tumors: A Children's Oncology Group (COG)  
290 Phase II study NCT00061893. *Pediatr Blood Cancer [Internet]* 2013 [cited 2019 Jan 2];60:409–  
291 14. Available from: <http://www.ncbi.nlm.nih.gov/pubmed/23065953>
- 292 5. Harris ES, Nelson WJ. VE-Cadherin: At the Front, Center, and Sides of Endothelial Cell  
293 Organization and Function. *Curr Opin Cell Biol [Internet]* 2010 [cited 2019 Jun 24];22:651.  
294 Available from: <http://www.ncbi.nlm.nih.gov/pubmed/20708398>
- 295 6. Garcia JGN, Liu F, Verin AD, Birukova A, Dechert MA, Gerthoffer WT, Bamberg JR, English D.  
296 Sphingosine 1-phosphate promotes endothelial cell barrier integrity by Edg-dependent  
297 cytoskeletal rearrangement. *J Clin Invest [Internet]* 2001 [cited 2018 Feb 23];108:689–701.  
298 Available from: <http://www.ncbi.nlm.nih.gov/pubmed/11544274>
- 299 7. Paik J-H, Skoura A, Chae S-S, Cowan AE, Han DK, Proia RL, Hla T. Sphingosine 1-phosphate  
300 receptor regulation of N-cadherin mediates vascular stabilization. *Genes Dev [Internet]* 2004  
301 [cited 2018 Jan 20];18:2392–403. Available from: <http://www.ncbi.nlm.nih.gov/pubmed/15371328>
- 302 8. Sanchez T, Skoura A, Wu MT, Casserly B, Harrington EO, Hla T. Induction of Vascular  
303 Permeability by the Sphingosine-1-Phosphate Receptor-2 (S1P2R) and its Downstream  
304 Effectors ROCK and PTEN. *Arterioscler Thromb Vasc Biol [Internet]* 2007 [cited 2018 Feb  
305 6];27:1312–8. Available from: <http://www.ncbi.nlm.nih.gov/pubmed/17431187>
- 306 9. Li Q, Chen B, Zeng C, Fan A, Yuan Y, Guo X, Huang X, Huang Q. Differential activation of  
307 receptors and signal pathways upon stimulation by different doses of sphingosine-1-phosphate  
308 in endothelial cells. *Exp Physiol [Internet]* 2015 [cited 2019 Jan 2];100:95–107. Available from:  
309 <http://www.ncbi.nlm.nih.gov/pubmed/25557733>
- 310 10. Morrell MBG, Alvarez-Florez C, Zhang A, Kleinerman ES, Savage H, Marmonti E, Park M, Shaw  
311 A, Schadler KL. Vascular modulation through exercise improves chemotherapy efficacy in Ewing  
312 sarcoma. *Pediatr Blood Cancer [Internet]* 2019 [cited 2019 Jun 22];e27835. Available from:  
313 <https://onlinelibrary.wiley.com/doi/abs/10.1002/pbc.27835>
- 314 11. Schadler KL, Thomas NJ, Galie PA, Bhang DH, Roby KC, Addai P, Till JE, Sturgeon K,  
315 Zaslavsky A, Chen CS, Ryeom S. Tumor vessel normalization after aerobic exercise enhances  
316 chemotherapeutic efficacy. *Oncotarget [Internet]* 2016 [cited 2018 Jan 19];7:65429–40. Available  
317 from: <http://www.ncbi.nlm.nih.gov/pubmed/27589843>
- 318 12. Dreher MR, Liu W, Michelich CR, Dewhirst MW, Yuan F, Chilkoti A. Tumor Vascular  
319 Permeability, Accumulation, and Penetration of Macromolecular Drug Carriers. *JNCI J Natl*  
320 *Cancer Inst [Internet]* 2006 [cited 2019 Jan 23];98:335–44. Available from:  
321 <http://www.ncbi.nlm.nih.gov/pubmed/16507830>
- 322 13. Sarkisyan G, Gay LJ, Nguyen N, Felding BH, Rosen H. Host endothelial S1PR1 regulation of  
323 vascular permeability modulates tumor growth. *Am J Physiol Cell Physiol [Internet]* 2014 [cited  
324 2018 Feb 10];307:C14–24. Available from: <http://www.ncbi.nlm.nih.gov/pubmed/24740542>
- 325 14. Du W, Takuwa N, Yoshioka K, Okamoto Y, Gonda K, Sugihara K, Fukamizu A, Asano M,  
326 Takuwa Y. S1P2, the G Protein-Coupled Receptor for Sphingosine-1-Phosphate, Negatively  
327 Regulates Tumor Angiogenesis and Tumor Growth In vivo in Mice. *Cancer Res [Internet]* 2010  
328 [cited 2019 Jan 12];70:772–81. Available from: <http://www.ncbi.nlm.nih.gov/pubmed/20068174>
- 329 15. Zhang G, Yang L, Kim GS, Ryan K, Lu S, O'Donnell RK, Spokes K, Shapiro N, Aird WC, Kluk  
330 MJ, Yano K, Sanchez T. Critical role of sphingosine-1-phosphate receptor 2 (S1PR2) in acute  
331 vascular inflammation. *Blood [Internet]* 2013 [cited 2018 Feb 8];122:443–55. Available from:  
332 <http://www.ncbi.nlm.nih.gov/pubmed/23723450>
- 333 16. Lopez D, Niu G, Huber P, Carter WB. Tumor-induced upregulation of Twist, Snail, and Slug  
334 represses the activity of the human VE-cadherin promoter. *Arch Biochem Biophys [Internet]*  
335 2009 [cited 2019 Jun 24];482:77–82. Available from:  
336 <https://linkinghub.elsevier.com/retrieve/pii/S0003986108005390>
- 337 17. Wang Y, Shi J, Chai K, Ying X, Zhou BP. The Role of Snail in EMT and Tumorigenesis. *Curr*  
338 *Cancer Drug Targets [Internet]* 2013 [cited 2019 Jun 24];13:963–72. Available from:  
339 <http://www.ncbi.nlm.nih.gov/pubmed/24168186>
- 340 18. Liu Y, Cox SR, Morita T, Kourembanas S. Hypoxia Regulates Vascular Endothelial Growth  
341 Factor Gene Expression in Endothelial Cells. *Circ Res [Internet]* 1995 [cited 2019 Jul 3];77:638–

- 342 43. Available from: <https://www.ahajournals.org/doi/10.1161/01.RES.77.3.638>  
343 19. Esser S, Lampugnani MG, Corada M, Dejana E, Risau W. Vascular endothelial growth factor  
344 induces VE-cadherin tyrosine phosphorylation in endothelial cells. *J Cell Sci [Internet]* 1998  
345 [cited 2019 Jul 3];111 ( Pt 13):1853–65. Available from:  
346 <http://www.ncbi.nlm.nih.gov/pubmed/9625748>  
347 20. Cosse J-P, Michiels C. Tumour hypoxia affects the responsiveness of cancer cells to  
348 chemotherapy and promotes cancer progression. *Anticancer Agents Med Chem [Internet]* 2008  
349 [cited 2019 Jul 3];8:790–7. Available from: <http://www.ncbi.nlm.nih.gov/pubmed/18855580>  
350 21. Bryan AM, Del Poeta M. Sphingosine-1-phosphate receptors and innate immunity. *Cell Microbiol*  
351 *[Internet]* 2018 [cited 2019 Jun 24];20:e12836. Available from:  
352 <http://www.ncbi.nlm.nih.gov/pubmed/29498184>  
353  
354

## 355 ACKNOWLEDGMENTS

356  
357 We acknowledge Minjeong Park, for help with statistical analysis, the Center for Energy Balance at the  
358 M.D. Anderson Cancer Center, and funding from the Cancer Prevention Research Institute of Texas  
359 (CPRIT) grant number RP190256.  
360

## 361 FIGURES

362 **Figure 1. S1PR1 activation by SEW2871 promotes tumor vascular normalization.** After A673  
363 tumor cells injection (7 days post-subcutaneous injection and 11 days post-intramuscular injection),  
364 tumor-bearing mice were treated with doxorubicin [DOX] (2mg/Kg, twice per week, intravenously)  
365 and/or SEW2871 [SEW] (S1PR1 agonist, 10mg/Kg, daily, orally). **(A and B)**  $\alpha$ -SMA (red) or NG2 (red)  
366 and CD31 (green) or FITC-dextran leak (green) and CD31 (red) immunofluorescence with DAPI  
367 staining (nuclei) in subcutaneous **(A)** and orthotopic tumors **(B)**; scale bar: 100 $\mu$ m. **(C and D)** The  
368 number of visible lumens and the number of vessels>100 $\mu$ m (large) were counted in 5 random  
369 sections/tumor. **C. Subcutaneous.** Bars show means  $\pm$  SEM,  $n=5-6$ . Two-way ANOVA, open lumens  
370 (SEW  $p=0.0465$ ), vessels>100 $\mu$ m (SEW  $p=0.016$ , DOX  $p=0.001$ ). **D. Orthotopic.** Bars show means  $\pm$   
371 SEM,  $n=5-7$ . Two-way ANOVA, open lumens (SEW  $p=0.014$ ), vessels>100 $\mu$ m (SEW  $p=0.015$ , DOX  
372  $p<0.0001$ ). **(E)** Mean  $\alpha$ SMA:CD31 ratio  $\pm$  SEM calculated in 5 random sections/tumor. *Subcutaneous*,  
373 two-way ANOVA (SEW  $p=0.002$ ),  $n=5-6$ . *Orthotopic*, two-way ANOVA (SEW $\times$ DOX  $p=0.047$ ),  $n=5-6$ .  
374 Post-hoc Tukey test and indicated by # $p=0.061$ . **(F)** Mean NG2:CD31 ratio  $\pm$  SEM calculated in 5

375 random sections/tumor. *Subcutaneous*, two-way ANOVA (SEW  $p=0.046$ , DOX  $p=0.068$ ),  $n=4-5$ .  
376 *Orthotopic*, two-way ANOVA (SEW  $p=0.065$ ),  $n=5-6$ . **(G)** Mean Dextran:CD31  $\pm$  SEM ratio for individual  
377 A673 tumors. *Subcutaneous*, two-way ANOVA (SEW  $p=0.009$ , DOXxSEW  $p=0.050$ ),  $n=4-7$ . Post-hoc  
378 Tukey test and indicated by  $**p<0.01$ ,  $***p<0.001$ . *Orthotopic*, two-way ANOVA (SEW  $p=0.004$ ),  $n=5-8$ .  
379 **(H)** Representative confocal images of subcutaneous and orthotopic tumors showing colocalization of  
380 VE-cadherin (red) and CD31 (green). Nuclei were counterstained with DAPI (blue). Scale bar  $10\mu\text{m}$ . Part  
381 of the section (white rectangle) is shown below in higher magnification (300x). **(I)** Graph shows  
382 Pearson's correlation coefficient for VE-cadherin and CD31 markers in subcutaneous and orthotopic  
383 tumors represented in Figure 1H. For each tumor 5 vessels were analyzed in different optical regions.  
384 *Subcutaneous*, two-way ANOVA (DOXO  $p=0.044$ , SEW  $p=0.044$ ). *Orthotopic*, two-way ANOVA (SEW  
385  $p=0.0003$ ).

386

387 **Figure 2. S1PR2 receptor inhibition by JTE-013 promotes tumor vasculature normalization.** After  
388 A673 tumor cells injection (7 days post-subcutaneous injection and 13 days post-intramuscular  
389 injection), tumor-bearing mice were treated with doxorubicin [DOX] (2 mg/Kg, twice per week, i.v.)  
390 and/or JTE-013 [JTE] (S1PR2 antagonist, 2.5mg/Kg daily in subcutaneous model and 5mg/Kg twice a  
391 day in orthotopic model, orally). **(A, B)**  $\alpha$ -SMA (red) or NG2 (red) and CD31 (green) or VE-cadherin in  
392 subcutaneous **(A)** and orthotopic tumors **(B)**; scale bar:  $100\mu\text{m}$ . **(C)** The average number of  
393 microvessels density (MVD), total vessels, the number of visible lumens and the number of  
394 vessels  $>100\mu\text{m}$  (large) were counted in 5 random sections/subcutaneous tumor. Bars show means  $\pm$   
395 SEM,  $n=5-6$ . Two-way ANOVA, MV (JTE  $p=0.023$ ); total vessels ( $p$ =non-significant); open lumens (JTE  
396  $p=0.067$ ); vessels  $>100\mu\text{m}$  (JTE  $p=0.068$ , DOX  $p=0.103$ ). **(D)** Mean  $\alpha$ SMA:CD31 ratio  $\pm$  SEM calculated  
397 in 5 random sections/tumor. *Subcutaneous*, two-way ANOVA (DOXO  $p=0.061$ ),  $n=5$ . *Orthotopic*, two-  
398 way ANOVA ( $p$ =ns),  $n=5-6$ . **(E)** Mean NG2:CD31 ratio  $\pm$  SEM calculated in 5 random sections/tumor.  
399 *Subcutaneous*, two-way ANOVA (DOXO  $p=0.109$ ),  $n=4-6$ . *Orthotopic*, two-way ANOVA (JTE  $p=0.107$ ),  
400  $n=5-6$ . **(F)** Representative images of FITC-dextran leak (green) and CD31 (red) immunofluorescence

401 with DAPI staining (nuclei) in orthotopic and subcutaneous tumors; scale bar: 100 $\mu$ m. **(G)** Mean  
402 Dextran:CD31  $\pm$  SEM ratio for individual A673 tumors. *Subcutaneous*,  $n=5-7$ , T-test Student \* $p=0.038$ .  
403 *Orthotopic*, T-test Student \* $p=0.027$ ,  $n=5-6$ . **(H)** Representative images of subcutaneous and  
404 orthotopic tumors. VE-cadherin (red), DAPI staining (nuclei); scale bar: 100 $\mu$ m. **(I)** Quantification of VE-  
405 cadherin by mean fluorescence intensity (MFI) calculated in 5 random sections/tumor. Values represent  
406 means  $\pm$  SEM. *Subcutaneous*, two-way ANOVA (JTE  $p=0.071$ ),  $n=5-6$ . *Orthotopic*, two-way ANOVA  
407 (JTE  $p=0.064$ ),  $n=5-6$ .

408

409 **Figure 3. S1PR1 activation by SEW2871 or S1PR2 inhibition by JTE-013 improves chemotherapy**  
410 **efficacy. (A)** Mean Tomato-lectin:CD31  $\pm$  SEM ( $n=4$ ) ratio defined the percentage of perfused vessels,  
411 t-test \* $p=0.028$ . **(B)** RT-PCR analysis of the mRNA expression levels of CaIX, GLUT-1, HIF1- $\alpha$ , VEGF-  
412 A normalized against GADPH in orthotopic tumor homogenates. Data are expressed as the mean  $\pm$   
413 SEM of triplicate values. Bars represent means  $\pm$  SEM,  $n =5-6$ . Statistical significance of the results  
414 was calculated by two-way analysis of variance (CaIX: SEW  $p=0.043$ ; GLUT-1: SEW  $p=0.0511$ ; VEGF-  
415 A: SEW  $p=0.045$ ; HIF-1 $\alpha$ : SEW  $p=0.078$ ). **(C)** A673 tumor volumes from mice treated with [DOX]  
416 and/or [SEW] were measured in indicated days. *Subcutaneous*. Values are means  $\pm$  SEM for 6-7  
417 animals in each group. Linear Mixed Model (Time: SEW vs CON \*\*\* $p<0.0001$ ; Time: DOX+SEW vs  
418 CON \* $p = 0.0131$  and Time: DOX+SEW vs DOX \*\*\* $p = <0.0001$ ). *A673 Orthotopic*. Values are means  $\pm$   
419 SEM for 5-8 animals in each group. Linear Mixed Model (TIME: CON vs DOX \* $p<0.05$ ; Time: CON vs  
420 SEW \*\* $p<0.01$ ; Time: DOX+SEW vs CON \*\*\* $p <0.0001$ ). **(D)** A673 cell proliferation assay (expressed  
421 as % of cell confluence) treated with SEW2871 (50nM) and doxorubicin (0.1nM) and combination of the  
422 two drugs. Linear Mixed Model: CON vs SEW \*\*\* $p<0.001$ ; CON vs DOXO \*\*\* $p<0.001$ . **(E)** RT-PCR  
423 analysis of the mRNA expression levels of CaIX, GLUT-, HIF-1 $\alpha$ , VEGF-A normalized against GADPH  
424 in orthotopic tumor homogenates. Data are expressed as the mean  $\pm$  SEM of triplicate values. Bars  
425 represent means  $\pm$  SEM,  $n=5-6$ . Statistical significance of the results was calculated by two-way  
426 ANOVA (CaIX:  $p=ns$ ; GLUT-1:  $p=ns$ ; VEGF-A  $p=ns$ ; HIF-1 $\alpha$   $p=ns$ ). **(F)** A673 tumor volumes from mice



427 treated with [DOX] and/or [JTE] were measured in indicated days. *Subcutaneous*. Values are means  $\pm$   
428 SEM for 6-8 animals in each group. Linear Mixed Model: Time: DOXO+JTE vs JTE \* $p=0.020$ .  
429 *Orthotopic*. Values are means  $\pm$  SEM for 5-7 animals in each group. Linear Mixed Model: CON vs DOX  
430  $p=0.016$ ; DOX vs DOXO+JTE  $p=0.032$ . **(G)** A673 cell proliferation assay (expressed as % of cell  
431 confluence) when treated with JTE-031 (50 $\mu$ M) and DOX (0.1nM) and combination of the two drugs.  
432 Linear Mixed Model: CON vs DOX \* $p<0.05$ ; JTE vs DOX+JTE \*\* $p<0.01$ .  
433

**Figure 1. S1PR1 activation by SEW2871 promotes tumor vascular normalization.**

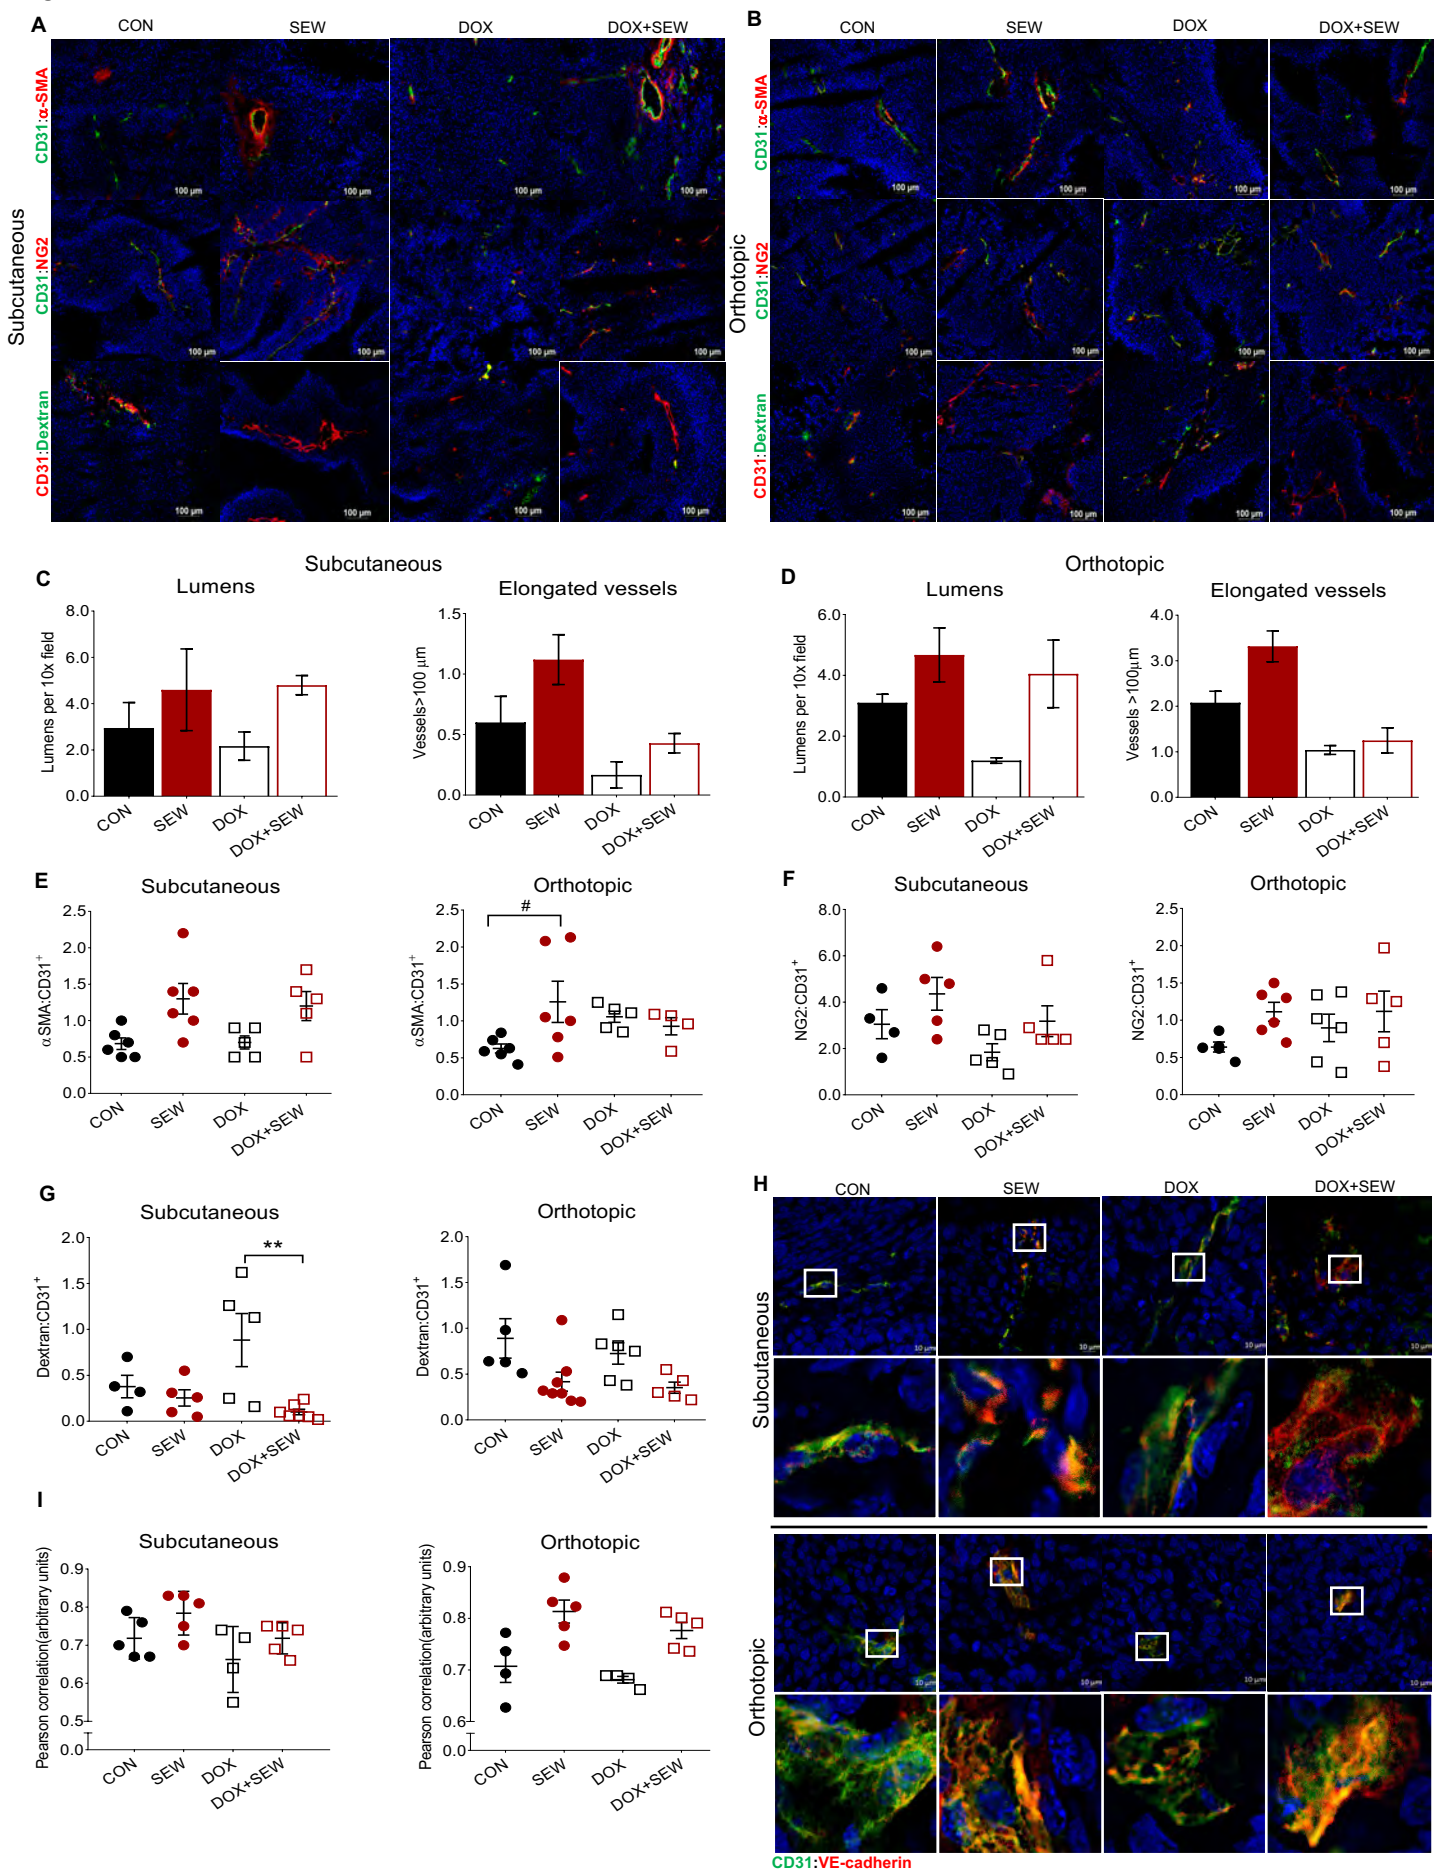



**Figure 2. S1PR2 inhibition by JTE-013 promotes tumor vasculature normalization .**

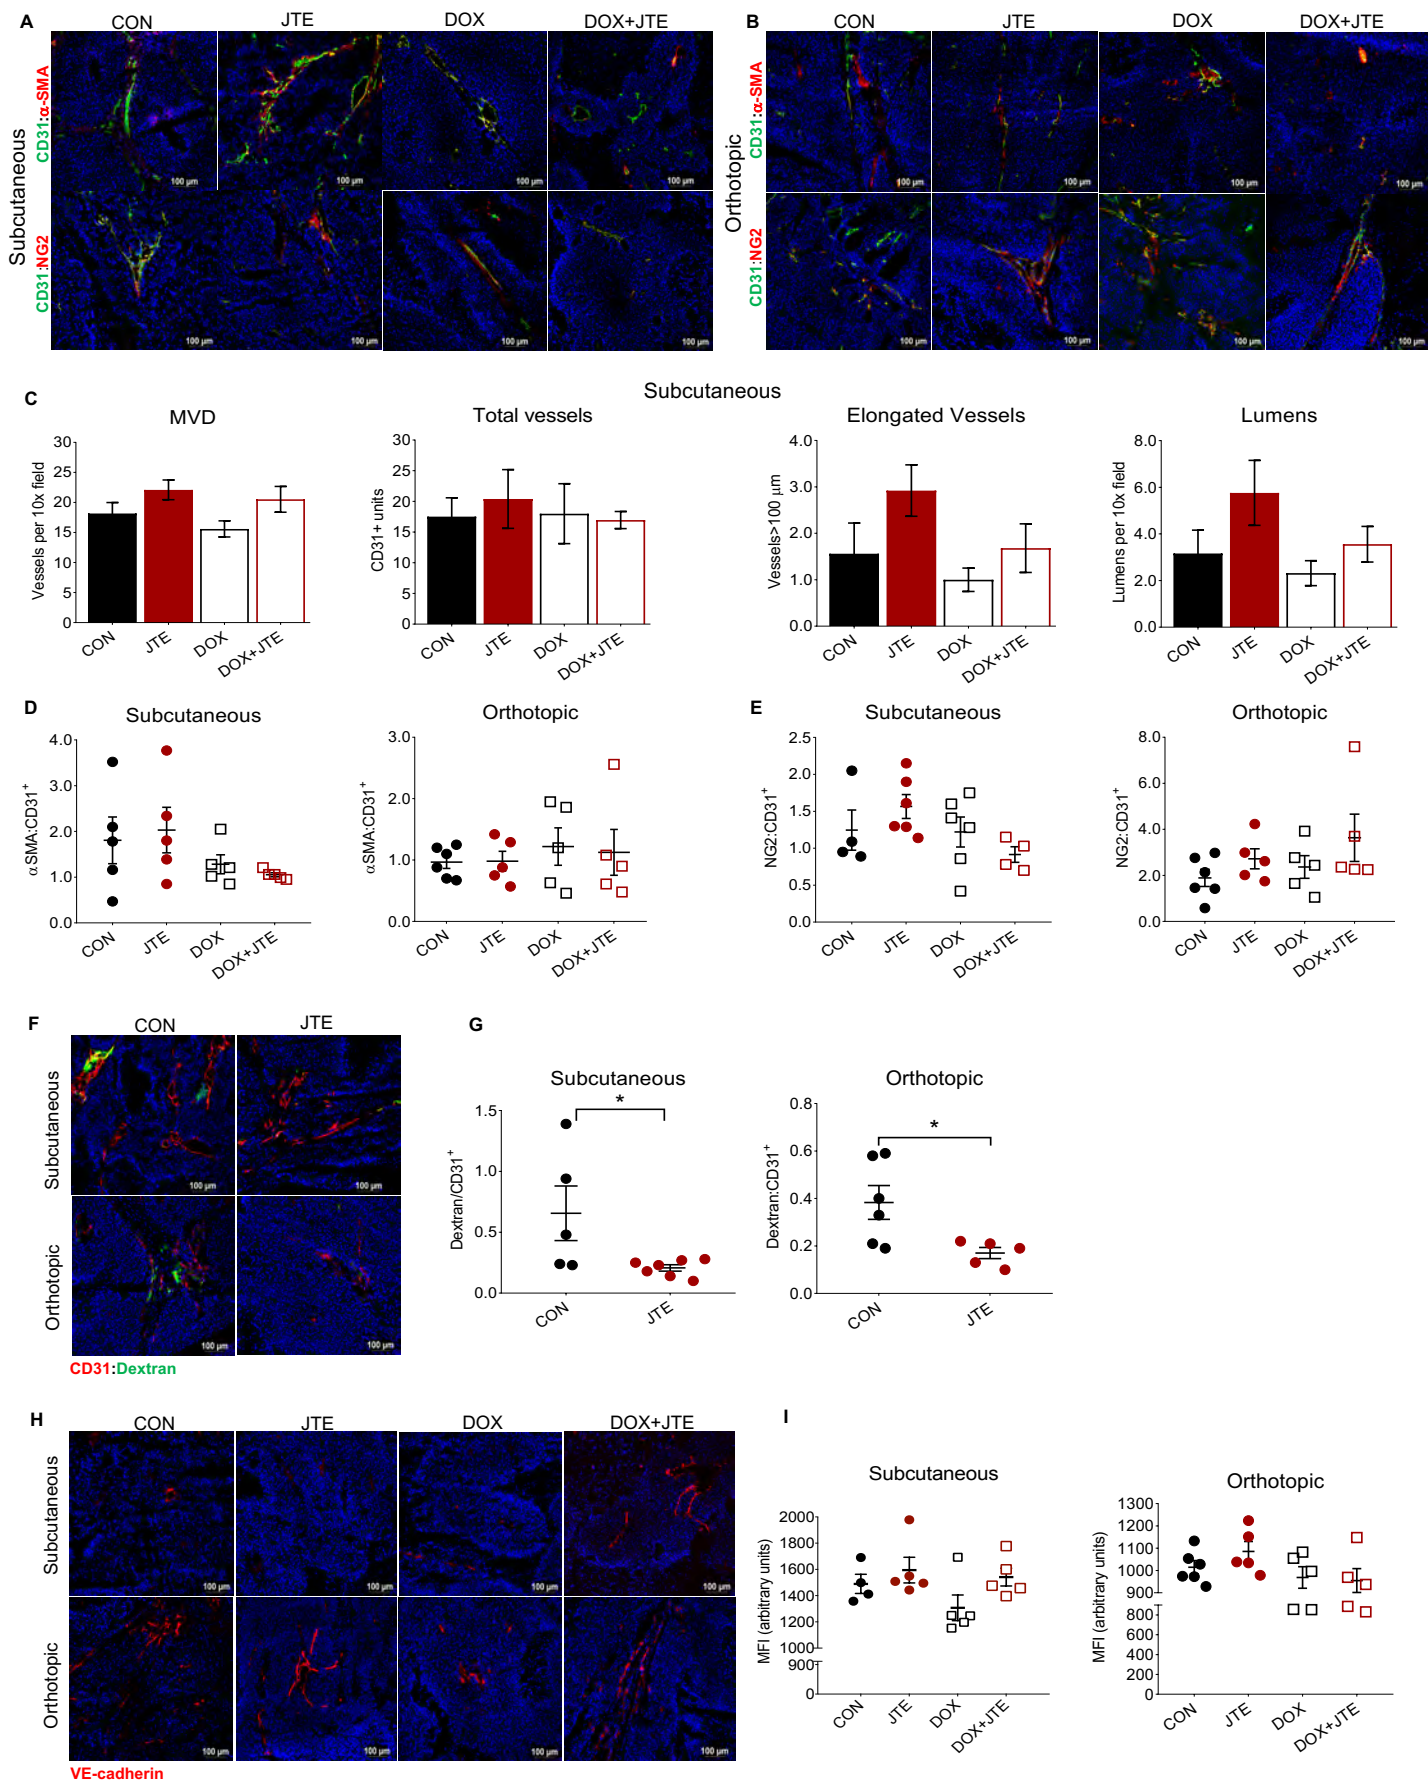

**Figure 3. S1PR1 activation by SEW2831 or S1PR2 inhibition by JTE-013 improved chemotherapy efficacy.**

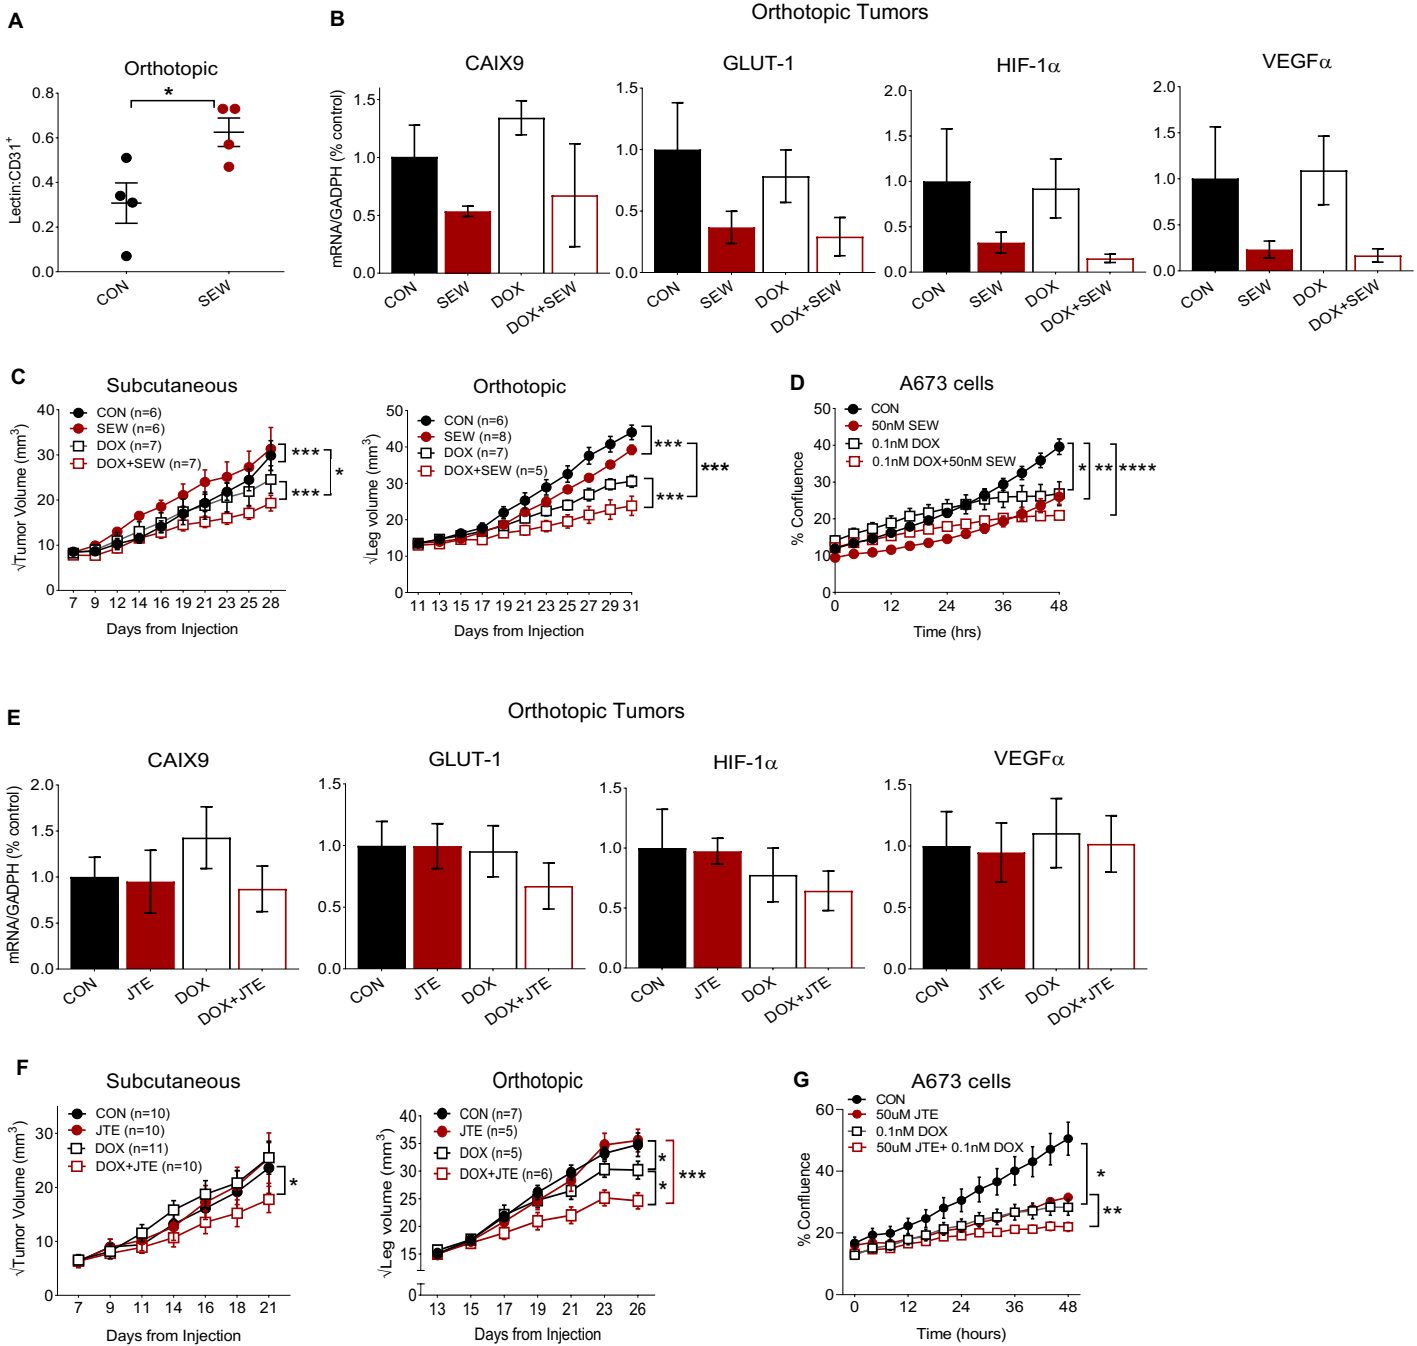

Source: http://biorxiv.org/content/10.1101/805655v1.full.pdf
